# Supplementary material
Source: PubMed Central journal article supplement (PMC374343)

WT  $\rightarrow$  RAG-1<sup>-/-</sup>

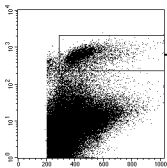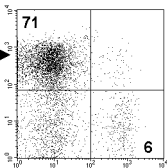

WT  $\rightarrow$  IRF-2<sup>-/-</sup> RAG-1<sup>-/-</sup>

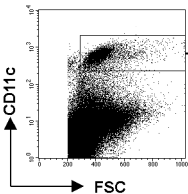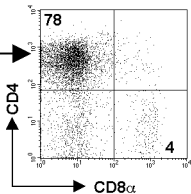

Supplement: pnas_101_11_3909__2.pdf [file pnas_101_11_3909__2.pdf]
